# Supplementary material for: Cryoballoon Versus Open Irrigated Radiofrequency Ablation in Patients With Paroxysmal Atrial Fibrillation: The Prospective, Randomized, Controlled, Noninferiority FreezeAF Study
Source: PubMed Central journal article supplement — Circulation. 2015 Oct 5;132(14):1311–9. doi: 10.1161/CIRCULATIONAHA.115.016871 (PMC4590523; doi:10.1161/circulationaha.115.016871), 2015-10-05
Supplement: cir-132-1311-s002.pdf [file cir-132-1311-s002.pdf]

## **SUPPLEMENTAL MATERIAL**

**Supplemental Table 1.** Sensitivity analysis of primary endpoint

| ITT population |                       | RF                | CB                | RD (95% CI)*            | p-value* |
|----------------|-----------------------|-------------------|-------------------|-------------------------|----------|
| 6 months       | Combined endpoint**   | 99 / 157 (0.631)  | 98 / 153 (0.641)  | 0.006 (-0.100 to 0.112) | 0.002    |
| 12 months      | Combined endpoint***  | 104 / 147 (0.707) | 106 / 144 (0.736) | 0.025 (-0.078 to 0.129) | < 0.001  |
|                | Only single procedure | 90 / 147 (0.612)  | 87 / 144 (0.604)  | -                       | -        |
| PP population  |                       |                   |                   |                         |          |
| 6 months       | Combined endpoint     | 99 / 154 (0.643)  | 98 / 150 (0.653)  | 0.010 (-0.096 to 0.117) | 0.002    |
| 12 months      | Combined endpoint     | 103 / 141 (0.730) | 105 / 141 (0.745) | 0.014 (-0.089 to 0.117) | < 0.001  |

*Legend:* ITT, intention to treat; PP, per-protocol; RD, rate difference (CB-RF); CI, confidence interval. P-values (one-sided) and confidence intervals were calculated using the Farrington-Manning method; \* for ITT, CIs and p-values were calculated by imputing missing data as „failure” (no missing data occurred for PP); \*\* equals the number of patients with single procedure success at 6 months; \*\*\* equals the number of patients with multiple procedure success at 12 months; persistent complications at 6 months in CB group (n=3) and RF group (n=0); no persistent complications at 12 months; numbers equal rhythm control rate at 12 months.
